# Supplementary material
Source: HighWire-hosted journal article supplement (https://erj.ersjournals.com/content/51/5/1701962)

Supplementary Figure 5

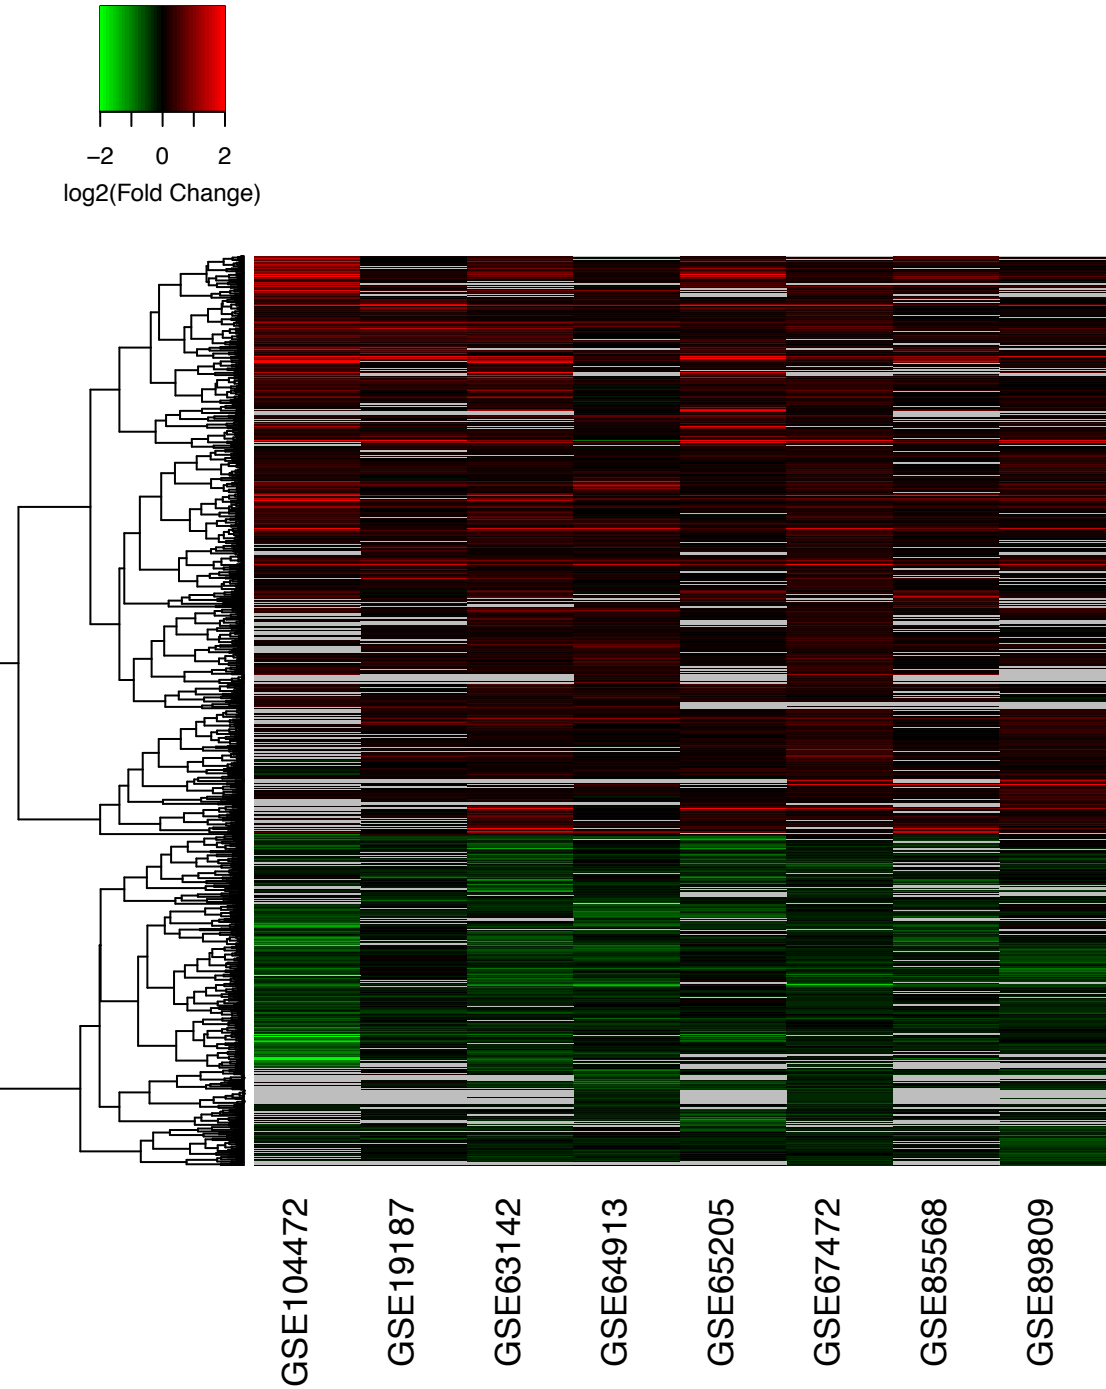

Supplement: inline-supplementary-material-6 [file inline-supplementary-material-6.pdf]
