# Supplementary material
Source: HighWire-hosted journal article supplement (https://erj.ersjournals.com/content/51/5/1701962)
Supplement: inline-supplementary-material-7 [file inline-supplementary-material-7.xlsx]

## Sheet: Sheet1
Supplementary Table 1. All identified studies
Obs	Disease	GEO ID	PMID	Ref	Year	platform	tissue	sampling	asthma	controls	Total Sample size	include/exclude	Reason for exclusion
1	asthma/AR	GSE46171	24433494	McErlean P, Berdnikovs S, Favoreto S, Shen J, Biyasheva A, et al. (2014) Asthmatics with exacerbation during acute respiratory illness exhibit unique transcriptional signatures within the nasal mucosa. Genome Medicine 6: 1.	2014	Agilent-014850 Whole Human Genome Microarray 4x44K G4112F	nasal epithelia	nasal scraping	34	9	43	exclude	lacking case definition
2	asthma	GSE23611	21187436	Choy DF, Modrek B, Abbas AR, Kummerfeld S, Clark HF, et al. (2011) Gene Expression Patterns of Th2 Inflammation and Intercellular Communication in Asthmatic Airways. The Journal of Immunology 186: 1861-1869.	2011	Agilent-014850 Whole Human Genome Microarray 4x44K G4112F	bronchial epithelia	brushing	27	13	40	exclude	samples are subset of or overlap with other studies
3	asthma	GSE4302	17898169	Woodruff PG, Boushey HA, Dolganov GM, Barker CS, Yang YH, et al. (2007) Genome-wide profiling identifies epithelial cell genes associated with asthma and with treatment response to corticosteroids. Proceedings of the National Academy of Sciences: 0707413104.	2009	Affymetrix Human Genome U133 Plus 2.0 Array	bronchial epithelia	brushing	42	28	70	exclude	samples are subset of or overlap with other studies
4	asthma	GSE8190	22246175	Yang IV, Tomfohr J, Singh J, Foss CM, Marshall HE, et al. (2012) The Clinical and Environmental Determinants of Airway Transcriptional Profiles in Allergic Asthma. American journal of respiratory and critical care medicine 185: 620-627.	2012	Agilent-012391 Whole Human Genome Oligo Microarray G4112A	bronchial epithelia	brushing	14	13	27	exclude	gene expression data was clearly different from all other studies, perhaps due to segmental challenge protocol
5	asthma	GSE38994	23314903	Yick CY, Zwinderman AH, Kunst PW, Grünberg K, Mauad T, et al. (2013) Transcriptome sequencing (RNA-Seq) of human endobronchial biopsies: asthma versus controls. European Respiratory Journal 42: 662-670.	2013	RNA-seq	bronchial epithelia	biopsy	4	5	9	exclude	insufficient sample size
6	asthma & COPD	GSE67472	25611785	Christenson SA, Arron JR, Steiling K, van den Berge M, Hijazi K, Hiemstra PS, Postma DS, Lenburg ME, Spira A, Woodruff PG. Asthma-COPD overlap. Clinical relevance of genomic signatures of type 2 inflammation in chronic obstructive pulmonary disease. Am J Respir Crit Care Med. 2015 Apr 1;191(7):758-66.	2015	Affymetrix Human Genome U133 Plus 2.0 Array	bronchial epithelia	brushing	62	43	105	include
7	asthma	GSE15823	15038835	Laprise C, Sladek R, Ponton A, Bernier MC, Hudson TJ, Laviolette M. Functional classes of bronchial mucosa genes that are differentially expressed in asthma.BMC Genomics. 2004 Mar 23;5(1):21.	2004	Affy U95Av2	bronchial epithelia	biopsy	2	2	4	exclude	insufficient sample size
8	asthma	GSE41649	19842841	Chamberland A, Madore AM, Tremblay K, Laviolette M, Laprise C. A comparison of two sets of microarray experiments to define allergic asthma expression pattern.Exp Lung Res. 2009 Jun;35(5):399-410.	2009	Affy U95Av2 or U133a	bronchial epithelia	biopsy	4	4	8	exclude	insufficient sample size
9	asthma	GSE43696	24518246	Voraphani N, Gladwin MT, Contreras AU, Kaminski N et al. An airway epithelial iNOS-DUOX2-thyroid peroxidase metabolome drives Th1/Th2 nitrative stress in human severe asthma. Mucosal Immunol 2014 Sep;7(5):1175-85.	2015	Agilent Human GE 4x44K V2	bronchial epithelia	brushing	66	25	91	exclude	samples are subset of or overlap with other studies
10	asthma	GSE63142	25338189	Modena et al. Gene Expression in Relation to Exhaled Nitric Oxide Identifies Novel Asthma Phenotypes with Unique Biomolecular Pathways Am J Resp Crit Care Med 2014; 190(12):1363-1372	2014	Agilent Human GE 4x44K V2	bronchial epithelia	brushing	129	26	155	include
11	asthma/AR	GSE19187	22005912	Giovannini-Chami L (2012) Distinct epithelial gene expression phenotypes in childhood respiratory allergy. The European respiratory journal 39: 1197-1205.	2012	Affymetrix Human Gene 1.0 ST Array	nasal epithelia	brushing	14	12	26	include
12	asthma	GSE65205	27745942	Yang et al. The nasal methylome and childhood atopic asthma. J Allergy Clin Immunol. 2017 May;139(5):1478-1488	2016	Agilent Human 8x60 v2	nasal epithelia	brushing	35	33	68	include
13	asthma	GSE104472	28294656	Yang IV, Richards A, Davidson EJ, Stevens AD et al. The Nasal Methylome: A Key to Understanding Allergic Asthma. Am J Respir Crit Care Med 2017 Mar 15;195(6):829-831	2017	Agilent-028004 SurePrint G3 Human GE 8x60K Microarray	bronchial epithelia	brushing	12	12	24	include
14	asthma	GSE64913	28045928	Singhania A et al. Altered Epithelial Gene Expression in Peripheral Airways of Severe Asthma. PLoS One. 2017 Jan 3;12(1):e0168680.	2017	Affymetrix HG U133 plus 2.0	bronchial epithelia	brushing	13	23	36	include
15	asthma	GSE89809	28933920	Singhania A, Wallington JC, Smith CG, Horowitz D et al. Multi-tissue Transcriptomics Delineates the Diversity of Airway T Cell Functions in Asthma. Am J Respir Cell Mol Biol 2017 Sep 21	2017	Affymetrix HT HG-U133+	bronchial epithelia	brushing	38	16	54	include
16	asthma	GSE85568	27942592	Nicodemus-Johnson et al. DNA methylation in lung cells is associated with asthma endotypes and genetic risk. JCI Insight. 2016 Dec 8;1(20):e90151.	2016	RNA-seq	bronchial epithelia	brushing	56	28	84	include
17	asthma	NA	24495433	Poole et al. (2014) Dissecting childhood asthma with nasal transcriptomics distinguishes subphenotypes of disease. JACI 133(3):670-678.	2014	RNA-seq	nasal epithelial brushings	brushing	10	10	20	exclude	Expression data not available
18	asthma	NA	15696077	Guajardo et al. (2005) Altered gene expression profiles in nasal respiratory epithelium reflect stable versus acute childhood asthma. JACI 115(2):243-251	2005	Affymetrix Human Genome U133 Plus 2.0 Array	nasal epithelial cells	brushing	20	10	30	exclude	Expression data not available
