# Supplementary material
Source: HighWire-hosted journal article supplement (https://erj.ersjournals.com/content/51/5/1701962)
Supplement: inline-supplementary-material-10 [file inline-supplementary-material-10.xlsx]

## Sheet: Sheet1
Supplementary Table 4. Overlap of Asthma DEGs with Asthma GWAS genes*
GWAS Catolog Information									Expression Meta-Analysis
Disease/trait	SNP	Key Gene#	Reported Gene(s)	Mapped Gene(s)	PMID	p-value	-log(p-value)	Odds Ratio	Hedges g	q-value	Direction
Asthma	rs9866261	ADAMTS9	ADAMTS9	ADAMTS9	26620591	1e-07	7	1.45	0.722526	6.95e-08	up
Allergic disease (asthma, hay fever or eczema)	rs71368508	ALOX15	SMTNL2, ALOX15	LOC105371498	29083406	2e-09	8.69897	1.124	0.77834	0.0004425	up
YKL-40 levels	rs4950928	CHI3L1	CHI3L1	CHI3L1	18403759	1e-13	13	0.3	-0.411346	0.0111407	down
Asthma	rs2786098	CRB1	DENND1B, CRB1	CRB1	20032318	9e-11	10.0458	1.43	-0.314528	0.02743	down
Asthma	rs9500927	HLA-DOA	HLA-DOA	BRD2 - HLA-DOA	21804548	4e-09	8.39794	1.13	-0.549887	0.006456	down
Allergic disease (asthma, hay fever or eczema)	rs3097670	HLA-DPA1	HLA-DPA1	HLA-DPA1, HLA-DPB1	29083406	8e-12	11.0969	1.064	-0.353303	0.0093497	down
Asthma	rs3129890	HLA-DRA	HLA-DRA	HLA-DRA - HLA-DRB9	21804548	5e-13	12.301	1.15	-0.411452	0.0040109	down
Allergic disease (asthma, hay fever or eczema)	rs848	IL13	IL13	IL13	29083406	2e-24	23.699	1.068	0.349206	0.0103695	up
Allergic disease (asthma, hay fever or eczema)	rs10865050	IL18R1	IL18R1	IL1RL1	29083406	0	60.1549	1.13	0.701996	2.48e-09	up
Asthma	rs3771180	IL1RL1	IL1RL1	IL1RL1	21804549	2e-15	14.699		0.706508	6.04e-05	up
Allergic disease (asthma, hay fever or eczema)	rs16922576	JAK2	JAK2	JAK2, INSL6	29083406	3e-10	9.52288	1.036	-0.435512	0.0006041	down
Asthma	rs75446656	JMJD1C	JMJD1C	JMJD1C	27611488	4e-08	7.39794	0.97	-0.304003	0.03546	down
Allergic disease (asthma, hay fever or eczema)	rs7130753	LAYN	LAYN, SIK2	LAYN - SIK2	29083406	7e-15	14.1549	1.045	0.503848	0.001317	up
Allergic disease (asthma, hay fever or eczema)	rs12551834	LRRC8A	C9orf114, LRRC8A	CCBL1	29083406	3e-09	8.52288	1.058	0.789826	2.81e-09	up
Allergic disease (asthma, hay fever or eczema)	rs227275	MANBA	MANBA	MANBA	29083406	4e-11	10.3979	1.034	-0.385717	0.047794	down
Allergic disease (asthma, hay fever or eczema)	rs4801001	RAB27B	DYNAP, RAB27B	DYNAP - RAB27B	29083406	6e-09	8.22185	1.031	0.474099	0.0054585	up
Allergic disease (asthma, hay fever or eczema)	rs10033073	STX18	STX18, MSX1	LOC101928279	29083406	1e-10	10	1.04	0.565764	0.0001413	up
*based on data from the GWAS Catalog (https://www.ebi.ac.uk/gwas/, as of Jan 31, 2018) with p-value threshold of 10E-7
# gene used to merge to DEGs
