# Supplementary material
Source: HighWire-hosted journal article supplement (https://erj.ersjournals.com/content/51/5/1701962)
Supplement: inline-supplementary-material-11 [file inline-supplementary-material-11.xlsx]

## Sheet: Sheet1
Supplementary Table 5. Asthma DEGs of large effect size
Gene Symbol	k	Hedges g	std error	tau^2	z value	p value	q value
CLCA1	8	1.13678	0.199057	0.208421	5.71082	1.12e-08	4.89e-06
NOX1	7	-0.986809	0.244521	0.299853	-4.03569	5.44e-05	0.0035123
CST1	8	1.63447	0.299687	0.56127	5.45393	4.93e-08	1.52e-05
DHX35	8	0.979094	0.172165	0.138421	5.68694	1.29e-08	5.31e-06
ITGA10	8	0.606861	0.197004	0.212535	3.08045	0.0020669	0.0466175
CST2	8	1.28525	0.23022	0.305073	5.58269	2.37e-08	8.79e-06
SLC24A3	8	0.924825	0.179644	0.160507	5.1481	2.63e-07	5.9e-05
GSN	8	1.03075	0.150938	0.08641	6.82901	8.55e-12	1.09e-08
KYAT1	4	1.1575	0.298073	0.208123	3.88326	0.0001031	0.0055058
FETUB	8	0.967443	0.151908	0.0898575	6.3686	1.91e-10	1.47e-07
FAM177B	4	1.13855	0.259551	0.143729	4.38661	1.15e-05	0.0010857
NOS2	8	0.810092	0.174232	0.147474	4.6495	3.33e-06	0.0004128
SCGB3A1	8	-0.906905	0.22548	0.304303	-4.02211	5.77e-05	0.0036763
SIGLEC6	8	0.746477	0.192508	0.198973	3.87764	0.0001055	0.0055782
CA8	8	-0.817664	0.118394	0.029046	-6.90632	4.97e-12	6.81e-09
MTURN	6	0.543122	0.177196	0.0963882	3.06509	0.002176	0.0483807
SHISA2	8	-0.734521	0.188666	0.187822	-3.89323	9.89e-05	0.0053619
ZMAT4	8	0.689	0.159892	0.113955	4.30915	1.64e-05	0.0014268
DENND4A	8	0.593213	0.183637	0.173885	3.23037	0.0012363	0.0330224
HEG1	8	-0.657472	0.172228	0.144149	-3.81745	0.0001348	0.0067542
ANO7	8	0.678018	0.137045	0.0642915	4.94742	7.52e-07	0.0001293
SLAMF7	8	-0.826843	0.136559	0.0617361	-6.05483	1.41e-09	8.12e-07
KRT23	8	1.09424	0.193786	0.194537	5.64661	1.64e-08	6.58e-06
CGREF1	8	0.531382	0.167625	0.13496	3.17007	0.001524	0.0381609
RASAL1	8	0.510926	0.110647	0.0196195	4.61763	3.88e-06	0.0004735
CHAD	8	0.789043	0.128015	0.045409	6.16367	7.11e-10	4.45e-07
POSTN	8	1.17774	0.205865	0.230823	5.72091	1.06e-08	4.72e-06
ENTPD8	5	0.633627	0.179888	0.0716383	3.52234	0.0004278	0.0157341
USP27X	7	-0.566971	0.160105	0.0871616	-3.54124	0.0003982	0.0149008
APELA	3	-0.997028	0.170354	0	-5.85269	4.84e-09	2.42e-06
GPX3	7	-0.642576	0.117595	0.0232783	-5.46431	4.65e-08	1.48e-05
MS4A2	8	0.914617	0.186455	0.179475	4.9053	9.33e-07	0.0001533
FXYD6	7	-0.701373	0.105448	0.00668219	-6.65135	2.9e-11	3.25e-08
DPYSL2	8	-0.574187	0.113697	0.0235815	-5.05015	4.41e-07	8.87e-05
TFF3	8	0.915575	0.20312	0.228423	4.50756	6.56e-06	0.0007104
GEM	8	-0.681557	0.171008	0.141583	-3.98553	6.73e-05	0.0040736
GSTA4	8	-0.574679	0.116777	0.0284853	-4.92118	8.6e-07	0.0001432
EPAS1	8	-0.720798	0.124457	0.0396688	-5.79153	6.97e-09	3.31e-06
PPP1R3B	8	-0.525317	0.164235	0.125024	-3.19857	0.0013811	0.0357025
FOLR1	8	-0.558814	0.119072	0.032597	-4.69306	2.69e-06	0.0003595
KRT6A	8	0.820687	0.199629	0.218975	4.11106	3.94e-05	0.0027727
NTRK2	8	1.01174	0.19005	0.187405	5.32354	1.02e-07	2.71e-05
GATA2	8	0.837817	0.109281	0.0147684	7.6666	1.77e-14	9.33e-11
UBE2J1	8	0.54032	0.153901	0.101109	3.51082	0.0004467	0.0161904
ACER2	5	0.651902	0.202132	0.0924232	3.22512	0.0012592	0.0334157
NCOA7	8	-0.703213	0.116745	0.0274739	-6.02351	1.71e-09	9.71e-07
CPA3	8	1.19373	0.220758	0.281219	5.40743	6.39e-08	1.86e-05
ADAMTS9	8	0.722526	0.11099	0.0181665	6.50985	7.52e-11	7.13e-08
PDIA5	6	0.919528	0.190721	0.118208	4.82131	1.43e-06	0.000217
CDH26	8	0.996967	0.155361	0.0984135	6.41708	1.39e-10	1.22e-07
AR	7	-0.758115	0.151254	0.0678897	-5.01221	5.38e-07	0.0001025
MPDU1	8	0.523418	0.14049	0.0728572	3.72565	0.0001948	0.0088146
CEACAM5	8	1.09399	0.110027	0.0126145	9.94291	2.71e-23	1e-18
CD109	8	0.599776	0.106256	0.0125772	5.64461	1.66e-08	6.58e-06
FBXL7	8	0.734981	0.0977148	0	7.5217	5.41e-14	2e-10
LINC00675	5	0.733162	0.13342	0.0173934	5.49515	3.9e-08	1.29e-05
C1orf186	5	1.24184	0.166574	0.0357748	7.45523	8.97e-14	3.01e-10
GALNT7	8	0.65821	0.137583	0.0653318	4.78408	1.72e-06	0.000251
TSPAN8	8	0.586363	0.117521	0.0299742	4.98943	6.06e-07	0.0001116
DQX1	8	0.749118	0.097608	0	7.67476	1.66e-14	9.33e-11
SLC5A3	7	0.541384	0.152376	0.070988	3.55294	0.000381	0.0144141
KAZALD1	8	0.730979	0.111546	0.0192604	6.55315	5.63e-11	5.63e-08
OR51E1	8	-0.541031	0.158029	0.110876	-3.42361	0.0006179	0.0204783
KIT	8	0.750878	0.172194	0.146139	4.36066	1.3e-05	0.0011778
PNMA2	8	-0.65978	0.126182	0.0440484	-5.22878	1.71e-07	4.18e-05
DANCR	4	0.67974	0.132505	0	5.12992	2.9e-07	6.38e-05
SNORD17	2	0.88799	0.253659	0.0223395	3.50073	0.000464	0.0166286
KCNK6	8	0.729781	0.110231	0.0175408	6.62048	3.58e-11	3.68e-08
SLC17A5	8	0.618817	0.129715	0.0507432	4.77059	1.84e-06	0.0002622
CPA4	8	0.609345	0.154998	0.102116	3.93132	8.45e-05	0.0047462
B3GNT6	8	0.705326	0.0971422	0	7.26076	3.85e-13	8.89e-10
SDF2L1	8	0.684364	0.1376	0.0661274	4.97358	6.57e-07	0.0001174
DNAJC10	8	0.506369	0.155114	0.104748	3.2645	0.0010966	0.0305249
ICA1	8	0.591471	0.1269	0.0459759	4.66094	3.15e-06	0.0004013
NRAP	8	0.502874	0.14296	0.0784926	3.5176	0.0004355	0.0159388
MDFI	8	0.575568	0.127778	0.0479624	4.50443	6.66e-06	0.0007173
HDC	8	0.841939	0.140996	0.0699004	5.97138	2.35e-09	1.3e-06
GSTA3	8	-0.678364	0.0971019	0	-6.98611	2.83e-12	4.75e-09
CREB3L4	8	0.665699	0.138473	0.0669962	4.80742	1.53e-06	0.0002307
MUC5AC	7	0.808603	0.100803	0	8.0216	1.04e-15	1.29e-11
LRRC8A	8	0.789826	0.111323	0.0181557	7.09491	1.29e-12	2.81e-09
CTSG	8	0.749759	0.138192	0.0659434	5.42549	5.78e-08	1.71e-05
CEP72	8	0.770093	0.103962	0.00779701	7.40747	1.29e-13	3.97e-10
INSR	8	-0.565521	0.0962998	0	-5.8725	4.29e-09	2.23e-06
A2M	8	-0.600269	0.167532	0.133226	-3.58301	0.0003397	0.0132899
TDRP	6	-0.694273	0.12571	0.0151475	-5.52283	3.34e-08	1.15e-05
ZMIZ1-AS1	3	-0.663158	0.165215	0	-4.01391	5.97e-05	0.0037482
FGFBP1	8	0.713348	0.1503	0.0901399	4.74615	2.07e-06	0.0002914
PTPRH	8	0.742422	0.127328	0.044681	5.83077	5.52e-09	2.65e-06
BDNF	8	0.508931	0.129181	0.0506114	3.93967	8.16e-05	0.0046763
CD274	8	0.647421	0.208252	0.246489	3.10884	0.0018782	0.0440004
RGN	7	-0.501355	0.104939	0	-4.77759	1.77e-06	0.0002562
ERGIC1	8	0.502615	0.128587	0.0502493	3.90875	9.28e-05	0.0051188
P2RX4	8	0.512319	0.0960377	0	5.33456	9.58e-08	2.58e-05
HPGDS	8	0.791839	0.10785	0.012964	7.34202	2.1e-13	5.56e-10
LRRC31	8	0.687964	0.127145	0.0453218	5.41084	6.27e-08	1.84e-05
PFKP	8	0.552329	0.142274	0.0758218	3.88214	0.0001035	0.0055153
PRKAR2B	8	-0.624488	0.113999	0.024155	-5.47804	4.3e-08	1.38e-05
RHOV	8	-0.553077	0.09636	0	-5.73969	9.48e-09	4.32e-06
C3	8	-0.849031	0.0983399	0	-8.63363	5.94e-18	1.1e-13
TRIM7	8	0.781344	0.126762	0.0434847	6.16384	7.1e-10	4.45e-07
KDELR3	8	0.576314	0.131229	0.0542461	4.39165	1.12e-05	0.001069
B3GAT1	8	-0.577541	0.1616	0.120022	-3.57389	0.0003517	0.0136002
SULF1	8	-0.576038	0.158975	0.112993	-3.62345	0.0002907	0.0118611
FBN2	8	0.504848	0.131088	0.0541986	3.85122	0.0001175	0.0060511
CAPN14	7	0.543296	0.119818	0.027555	4.53434	5.78e-06	0.0006454
SLC9A3	8	0.531001	0.0962997	0	5.51405	3.51e-08	1.19e-05
TMEM211	4	0.561273	0.150308	0	3.73417	0.0001883	0.008634
TMED3	8	0.516669	0.126905	0.0470445	4.07131	4.68e-05	0.0030916
RPRM	8	-0.578482	0.119577	0.0332289	-4.83775	1.31e-06	0.0002031
PRB1	7	0.563442	0.101992	0.0034002	5.52435	3.31e-08	1.15e-05
SUSD4	8	-0.556269	0.134557	0.0606139	-4.13408	3.56e-05	0.0025681
EPB41L2	8	-0.679885	0.10102	0.00513561	-6.73019	1.69e-11	2.02e-08
FREM2	7	-0.594096	0.145118	0.0555824	-4.09389	4.24e-05	0.0029031
NEK6	8	0.692389	0.101212	0.0051599	6.84094	7.87e-12	1.04e-08
LAYN	8	0.503848	0.116355	0.0284602	4.33028	1.49e-05	0.001317
PTGS1	8	0.606105	0.163548	0.123776	3.70596	0.0002106	0.0092786
SLC18A2	8	0.805755	0.144347	0.0784138	5.58206	2.38e-08	8.79e-06
NRCAM	8	-0.532548	0.130952	0.0530011	-4.06675	4.77e-05	0.0031415
STEAP4	8	-0.663801	0.195292	0.211994	-3.39902	0.0006763	0.0217576
SERPINB10	8	0.662045	0.178997	0.164148	3.69864	0.0002168	0.0094827
CXCL1	8	-0.5044	0.104548	0.0109881	-4.82459	1.4e-06	0.0002152
MANF	8	0.592526	0.0965384	0	6.13773	8.37e-10	5.07e-07
PXDN	8	0.759282	0.141421	0.0722204	5.36897	7.92e-08	2.2e-05
TLL1	8	-0.561372	0.172377	0.146471	-3.25665	0.0011274	0.0309853
SLC7A1	8	0.64543	0.170405	0.139714	3.78763	0.0001521	0.0073688
SERPINB2	8	1.04137	0.189326	0.186559	5.50042	3.79e-08	1.26e-05
GAREM1	4	0.626552	0.159216	0	3.93525	8.31e-05	0.0047405
LRRC8D	8	0.780855	0.112936	0.0207265	6.91412	4.71e-12	6.69e-09
SGK1	8	0.624731	0.126731	0.0449035	4.92959	8.24e-07	0.0001397
VSIG1	7	0.696651	0.107898	0.00179524	6.45655	1.07e-10	9.9e-08
UGT2A2	3	0.562836	0.182232	0.0183962	3.08857	0.0020112	0.0457526
BORCS8	3	0.563779	0.171661	0	3.28426	0.0010225	0.0289646
SPRR1B	8	0.578097	0.121201	0.0359298	4.76975	1.84e-06	0.0002623
AGPS	8	0.624962	0.126832	0.0452483	4.9275	8.33e-07	0.0001406
GALNT1	8	0.584227	0.104631	0.0104439	5.58371	2.35e-08	8.79e-06
FUT3	8	0.762683	0.0976211	0	7.81269	5.6e-15	5.17e-11
UTP20	8	0.687906	0.0977805	0.00051633	7.03521	1.99e-12	3.68e-09
ALOX15	8	0.77834	0.167972	0.132517	4.63375	3.59e-06	0.000444
CYP2C18	8	0.564526	0.103773	0.0094385	5.43998	5.33e-08	1.6e-05
PEG10	8	-0.647738	0.0992339	0.00279388	-6.52739	6.69e-11	6.51e-08
IL1RL1	8	0.706508	0.137357	0.0637217	5.14357	2.7e-07	6e-05
CD200R1	8	0.667121	0.159198	0.111236	4.1905	2.78e-05	0.0021526
FAM83E	8	0.555019	0.113884	0.0242878	4.87353	1.1e-06	0.0001725
SRPRB	8	0.537204	0.115223	0.0268251	4.6623	3.13e-06	0.0004004
AADAC	8	0.742733	0.097452	0	7.62153	2.51e-14	1.16e-10
TPRXL	8	0.613169	0.129366	0.0503284	4.73979	2.14e-06	0.0002984
CYP2J2	8	-0.613324	0.200285	0.227216	-3.06226	0.0021967	0.048792
SLC16A9	8	0.611338	0.157928	0.10955	3.87098	0.0001084	0.005692
EPHX4	8	0.629044	0.139307	0.0690783	4.51553	6.32e-06	0.0006908
SLC6A8	7	0.844823	0.11232	0.00566414	7.52157	5.41e-14	2e-10
FHOD3	8	-0.698878	0.167614	0.134883	-4.16958	3.05e-05	0.0023117
DCANP1	2	-0.789095	0.198343	0	-3.97844	6.94e-05	0.0041495
MRAP2	8	0.693183	0.148833	0.0901345	4.65747	3.2e-06	0.0004039
ELOVL5	8	0.739743	0.181129	0.166077	4.08407	4.43e-05	0.0029799
KLF4	8	0.618196	0.128806	0.0486392	4.79943	1.59e-06	0.0002372
FOXA3	8	0.677302	0.136174	0.0626789	4.97379	6.57e-07	0.0001174
PON3	8	0.5433	0.096285	0	5.64262	1.67e-08	6.58e-06
TMEM200A	8	0.657006	0.103684	0.00872123	6.33664	2.35e-10	1.66e-07
CHPF	8	0.652106	0.102054	0.00631426	6.3898	1.66e-10	1.33e-07
PPIC	8	0.534587	0.0961355	0	5.56076	2.69e-08	9.83e-06
SFN	8	0.588978	0.117562	0.0295714	5.00995	5.44e-07	0.0001032
RABAC1	8	0.70923	0.14927	0.0899996	4.75132	2.02e-06	0.0002851
VPS37B	8	0.565531	0.110148	0.0184122	5.13427	2.83e-07	6.27e-05
SLC52A2	6	0.502757	0.110373	0	4.55506	5.24e-06	0.0006012
ALOX15B	8	0.645884	0.0967797	0	6.67376	2.49e-11	2.88e-08
LYN	8	-0.513428	0.126059	0.0454218	-4.07291	4.64e-05	0.0030759
SNORA74B	2	0.871809	0.223598	0	3.89901	9.66e-05	0.0052759
GRK5	8	0.572283	0.142345	0.0767431	4.02039	5.81e-05	0.0036848
ITLN1	8	0.799518	0.239758	0.356333	3.33469	0.0008539	0.025649
CYP2A13	7	-0.667153	0.146455	0.0719873	-4.55536	5.23e-06	0.0006012
TAF13	8	0.520333	0.130297	0.053122	3.99344	6.51e-05	0.0039758
LRIG1	8	-0.537285	0.0969727	0.00091209	-5.54058	3.01e-08	1.06e-05
GMPR	8	0.558273	0.0964917	0	5.78571	7.22e-09	3.38e-06
DPYSL3	8	0.652182	0.163259	0.122633	3.99478	6.48e-05	0.0039697
PRB2	4	0.62804	0.130219	0	4.82294	1.41e-06	0.0002161
MORC4	7	0.551075	0.105176	0	5.23953	1.61e-07	4.02e-05
MAPK13	8	0.610721	0.149939	0.0929203	4.07314	4.64e-05	0.0030759
SLC39A14	8	0.617456	0.131765	0.054855	4.68604	2.79e-06	0.0003691
TMEM125	8	0.572759	0.0964194	0	5.94029	2.85e-09	1.52e-06
PARM1	8	0.586326	0.159987	0.114977	3.66485	0.0002475	0.0105366
ABRACL	6	0.765957	0.171082	0.0850743	4.47714	7.57e-06	0.0008036
TFF1	8	0.553153	0.096388	0	5.73882	9.53e-09	4.32e-06
GALE	8	0.584558	0.183898	0.17763	3.1787	0.0014793	0.0374312
CTSV	6	0.554844	0.179437	0.100807	3.09213	0.0019872	0.0453557
YIPF1	8	0.642451	0.0967525	0	6.64015	3.13e-11	3.41e-08
FAM83D	8	0.941729	0.132954	0.0535441	7.08311	1.41e-12	2.89e-09
DNAJC12	8	0.644329	0.13154	0.0542936	4.89836	9.66e-07	0.0001574
TMCC1-AS1	3	-0.503403	0.164921	0.0009851	-3.05239	0.0022703	0.0497538
TNS3	8	-0.519608	0.103832	0.00986884	-5.0043	5.61e-07	0.0001057
AFAP1L1	8	-0.528901	0.0961403	0	-5.50134	3.77e-08	1.26e-05
TIMP1	7	0.778577	0.17821	0.123673	4.36888	1.25e-05	0.0011571
FBXO16	8	0.502361	0.103874	0.0101482	4.83624	1.32e-06	0.0002038
TRIM47	8	0.550791	0.12381	0.0405271	4.44869	8.64e-06	0.0008921
LINC00346	5	0.508461	0.123456	0	4.11857	3.81e-05	0.0026947
LSR	8	0.595786	0.113883	0.0237294	5.23156	1.68e-07	4.14e-05
PLPP6	4	0.769686	0.174232	0.0138899	4.4176	9.98e-06	0.0009838
S100A16	8	0.696314	0.169013	0.137128	4.11988	3.79e-05	0.0026845
SLC26A2	8	0.573265	0.108448	0.0160224	5.2861	1.25e-07	3.19e-05
WNT5B	8	-0.62437	0.109707	0.0176021	-5.69123	1.26e-08	5.24e-06
KCNA1	8	-0.656391	0.127383	0.0464059	-5.15289	2.57e-07	5.78e-05
TOX	8	-0.629663	0.141237	0.0724312	-4.45819	8.27e-06	0.0008631
CMYA5	8	0.707873	0.190521	0.192961	3.71546	0.0002028	0.0089955
SSR3	8	0.5135	0.133421	0.0589252	3.84873	0.0001187	0.0061046
ACOX2	8	-0.621706	0.122929	0.0384351	-5.05743	4.25e-07	8.71e-05
XKRX	7	-0.573229	0.129732	0.0328333	-4.41856	9.94e-06	0.0009821
VWF	8	0.591492	0.163917	0.124965	3.6085	0.000308	0.0124427
CDH2	8	-0.611536	0.1212	0.0358962	-5.04569	4.52e-07	8.93e-05
C2orf72	7	-0.551987	0.101349	0.0027251	-5.44639	5.14e-08	1.57e-05
WFDC21P	3	0.71273	0.165407	0	4.30894	1.64e-05	0.0014268
SERPINB13	8	0.517285	0.100967	0.00600157	5.12333	3e-07	6.49e-05
GNPNAT1	8	0.703835	0.111092	0.0191918	6.33559	2.36e-10	1.66e-07
ZNF467	7	0.611755	0.168488	0.118971	3.63086	0.0002825	0.0116155
SPOUT1	4	0.532077	0.158403	0	3.35901	0.0007822	0.02399
ZNF660	8	-0.524697	0.119243	0.0335522	-4.40023	1.08e-05	0.0010437
PRSS16	8	0.576269	0.177716	0.1631	3.24263	0.0011843	0.0320497
HID1	6	0.577762	0.144238	0.0409948	4.00561	6.19e-05	0.0038443
GAREM2	4	-0.546473	0.158234	0	-3.45358	0.0005532	0.0189003
S100A14	8	0.54816	0.156814	0.109897	3.49561	0.000473	0.0168772
STARD5	8	0.523638	0.140689	0.0728596	3.72194	0.0001977	0.008872
CISH	8	0.553104	0.154942	0.103089	3.56974	0.0003573	0.0137455
POC1B	8	0.65398	0.147055	0.08556	4.44718	8.7e-06	0.0008959
LBX2-AS1	4	0.540959	0.167981	0.035558	3.22037	0.0012803	0.0337724
VSTM1	7	0.643927	0.123544	0.0203258	5.21214	1.87e-07	4.51e-05
HS6ST2	7	0.666173	0.106123	0	6.27734	3.44e-10	2.36e-07
DOK1	8	0.565384	0.096452	0	5.86182	4.58e-09	2.32e-06
S100A10	8	0.531046	0.135178	0.0615894	3.92849	8.55e-05	0.0047878
SPON1	7	-0.521755	0.105077	0	-4.96543	6.85e-07	0.0001218
MAOA	7	0.726451	0.140563	0.0486108	5.16815	2.36e-07	5.39e-05
CYP2R1	8	0.513895	0.0958747	0	5.36007	8.32e-08	2.28e-05
ATP13A4	8	-0.601427	0.096322	0	-6.24392	4.27e-10	2.87e-07
LOXL4	8	0.555288	0.141576	0.0743343	3.92219	8.77e-05	0.0048999
PGGHG	4	-0.652459	0.159116	0	-4.10053	4.12e-05	0.0028535
GGH	8	0.675232	0.0973211	0	6.93819	3.97e-12	6.38e-09
RCAN2	8	-0.536627	0.116359	0.0286625	-4.61183	3.99e-06	0.0004822
CTSC	8	0.596184	0.158846	0.111291	3.75322	0.0001746	0.0081691
RASSF10	6	-0.594065	0.1423	0.0371507	-4.17474	2.98e-05	0.0022785
HPCAL1	8	0.543556	0.132957	0.0576881	4.08819	4.35e-05	0.002938
ABCA13	8	-0.571291	0.130931	0.0543947	-4.36329	1.28e-05	0.0011755
SH2D1B	8	0.571985	0.161848	0.117737	3.53408	0.0004092	0.0152181
UTS2	8	0.550415	0.0962837	0	5.71659	1.09e-08	4.78e-06
ADAM28	8	-0.526781	0.14133	0.0752891	-3.72732	0.0001935	0.0087671
ST8SIA4	8	-0.533869	0.115417	0.0269783	-4.62559	3.74e-06	0.0004587
HPDL	8	0.533011	0.13776	0.0674167	3.86912	0.0001092	0.0057142
CHDH	8	0.517624	0.16638	0.132345	3.1111	0.0018639	0.0437989
RUNX1T1	8	-0.54235	0.0961944	0	-5.63807	1.72e-08	6.62e-06
CLTB	8	0.621367	0.15202	0.0965982	4.08741	4.36e-05	0.0029426
SCEL	8	0.560444	0.139518	0.0697498	4.01701	5.89e-05	0.0037182
PDLIM3	8	-0.518531	0.0961557	0	-5.39262	6.94e-08	1.99e-05
PYM1	4	0.635419	0.159032	0	3.99554	6.45e-05	0.0039636
S100P	8	0.583135	0.108916	0.0167907	5.35398	8.6e-08	2.34e-05
PCAT19	4	0.972461	0.183612	0.0474272	5.29629	1.18e-07	3.09e-05
SLC45A3	7	0.608618	0.099278	0	6.13044	8.76e-10	5.23e-07
FA2H	8	0.667541	0.136767	0.0643217	4.88087	1.06e-06	0.000169
PMM2	8	0.510909	0.101707	0.00725372	5.02337	5.08e-07	9.78e-05
GRAMD3	8	-0.582395	0.157748	0.111845	-3.69193	0.0002226	0.0096563
MPV17L2	8	0.510066	0.0960249	0	5.31181	1.09e-07	2.87e-05
EIF6	8	0.548749	0.111928	0.0214533	4.9027	9.45e-07	0.0001546
KDELR1	8	0.642874	0.0969665	0	6.62986	3.36e-11	3.55e-08
ST6GAL1	8	0.682871	0.189532	0.190753	3.60294	0.0003146	0.0125843
SAA2	5	-0.543443	0.163167	0.0474929	-3.3306	0.0008666	0.0258818
BFSP1	8	0.507816	0.0960101	0	5.28919	1.23e-07	3.18e-05
BORCS6	4	0.546457	0.15814	0	3.45553	0.0005492	0.0187953
FAXC	6	0.573304	0.111113	0	5.15967	2.47e-07	5.61e-05
GSTM2P1	4	-0.511502	0.144382	0	-3.5427	0.0003961	0.014847
C12orf57	7	0.741971	0.182062	0.150085	4.07538	4.59e-05	0.0030599
PYCR1	8	0.61307	0.158419	0.112766	3.86992	0.0001089	0.0057088
IL18R1	7	0.700833	0.110152	0.0126587	6.36242	1.99e-10	1.47e-07
HLA-DOA	8	-0.549887	0.14358	0.0788061	-3.82983	0.0001282	0.0065024
MYADM	8	0.560153	0.167148	0.133259	3.35124	0.0008045	0.0245587
CLC	8	0.823134	0.178791	0.159968	4.60389	4.15e-06	0.0004939
UPK1B	8	0.86869	0.119052	0.0298228	7.29673	2.95e-13	7.27e-10
SLC6A14	7	0.547483	0.173946	0.116302	3.14743	0.0016471	0.0404041
PROS1	8	-0.534452	0.0963015	0	-5.54977	2.86e-08	1.03e-05
SOD2	8	-0.505298	0.12622	0.0460281	-4.0033	6.25e-05	0.0038718
ARL1	8	0.592895	0.174054	0.151677	3.40639	0.0006583	0.0212712
TPO	8	0.616937	0.114679	0.0256772	5.37966	7.46e-08	2.12e-05
KCNE3	8	0.587626	0.161528	0.120395	3.63792	0.0002748	0.0114417
ORMDL2	8	0.574213	0.09644	0	5.95409	2.62e-09	1.42e-06
CX3CR1	8	-0.628572	0.122603	0.0381693	-5.12688	2.95e-07	6.41e-05
SIGLEC8	8	0.567819	0.123234	0.0403925	4.60764	4.07e-06	0.0004872
FAM110C	8	0.647755	0.118709	0.0318746	5.45668	4.85e-08	1.51e-05
CKAP4	8	0.60017	0.0965445	0	6.21652	5.08e-10	3.36e-07
SLC16A6	8	-0.617405	0.150832	0.0954574	-4.09333	4.25e-05	0.0029031
OR6C74	3	-0.606483	0.194094	0	-3.12469	0.0017799	0.0424781
P2RY2	8	-0.568803	0.141768	0.0748982	-4.0122	6.02e-05	0.0037691
ECT2	8	0.559655	0.138555	0.0680861	4.03923	5.36e-05	0.0034658
SNTG2	8	0.614728	0.0965853	0	6.36461	1.96e-10	1.47e-07
EGFL6	7	0.679824	0.10612	0	6.40616	1.49e-10	1.27e-07
STX18	8	0.565764	0.114957	0.0260549	4.92152	8.59e-07	0.0001432
SHISA8	6	0.551396	0.110827	0	4.97528	6.52e-07	0.0001174
SMAP1	8	0.59536	0.156492	0.107795	3.80441	0.0001421	0.0070343
SRRM2-AS1	3	-0.583766	0.163955	0	-3.56054	0.0003701	0.0140754
TNFAIP2	8	-0.525787	0.135101	0.0628782	-3.89182	9.95e-05	0.0053773
REP15	4	0.629515	0.150819	0	4.17397	2.99e-05	0.0022815
FKBP2	8	0.518525	0.0966313	0.00055005	5.36601	8.05e-08	2.22e-05
DISP1	8	0.68975	0.107362	0.0132735	6.42455	1.32e-10	1.19e-07
CDC42EP5	8	0.598845	0.135814	0.0632433	4.40931	1.04e-05	0.0010141
VNN3	8	-0.578578	0.0962621	0	-6.01044	1.85e-09	1.04e-06
HOMER2	8	0.624129	0.139127	0.0698324	4.48605	7.26e-06	0.0007752
CD44	8	0.776312	0.205795	0.236855	3.77226	0.0001618	0.0077165
LINC00327	4	0.53097	0.134681	0	3.94241	8.07e-05	0.0046521
WNK4	8	-0.533759	0.131196	0.055347	-4.06842	4.73e-05	0.0031246
TRAF3IP2	8	-0.548854	0.0961613	0	-5.70763	1.15e-08	4.92e-06
HMG20B	8	0.55262	0.0963124	0	5.73779	9.59e-09	4.32e-06
TMEM241	6	-0.707455	0.111686	0	-6.33435	2.38e-10	1.66e-07
SNCA	8	0.520728	0.114839	0.0261555	4.53441	5.78e-06	0.0006454
PLA2G4A	8	0.511138	0.123792	0.0417118	4.12899	3.64e-05	0.0026199
NEURL3	6	-0.505869	0.119837	0	-4.22129	2.43e-05	0.0019692
GPRASP1	7	-0.511298	0.105032	0	-4.86801	1.13e-06	0.0001766
PPP1R9A	8	-0.533632	0.0963019	0	-5.54124	3e-08	1.06e-05
NHS	7	-0.616094	0.112432	0.00783105	-5.47972	4.26e-08	1.38e-05
HIST1H2BK	8	0.655944	0.175742	0.1554	3.73243	0.0001896	0.0086764
LINC01133	5	0.629662	0.159053	0.0518458	3.95883	7.53e-05	0.0043986
PHLDB2	8	0.649767	0.206732	0.244396	3.14305	0.001672	0.0408513
TSTA3	8	0.519324	0.0961571	0	5.40078	6.64e-08	1.92e-05
ABHD17C	6	0.639467	0.156093	0.0600091	4.09671	4.19e-05	0.0028848
ADIRF-AS1	3	-0.611713	0.176621	0.00883099	-3.46341	0.0005334	0.0183927
GUCY2GP	3	0.514948	0.153963	0	3.34462	0.000824	0.0250247
PLA1A	8	-0.520393	0.139455	0.0714065	-3.73162	0.0001903	0.0086936
SERPINB4	8	0.680639	0.171657	0.141852	3.9651	7.34e-05	0.0042981
NEDD9	8	0.558251	0.135338	0.0617083	4.12487	3.71e-05	0.0026467
CDK14	8	-0.614997	0.0966513	0	-6.36305	1.98e-10	1.47e-07
LRRC59	8	0.505676	0.14813	0.0897586	3.41373	0.0006408	0.0208993
OSTC	8	0.559706	0.14722	0.0879643	3.80182	0.0001436	0.0070876
PWAR5	4	-0.667795	0.161523	0.0274046	-4.13437	3.56e-05	0.0025681
PCBP1-AS1	3	-0.651824	0.164893	0	-3.95301	7.72e-05	0.0044858
SYBU	8	0.51221	0.0960898	0	5.33054	9.79e-08	2.62e-05
SLC39A8	8	0.627948	0.176354	0.157403	3.56072	0.0003698	0.0140754
FGF13	7	0.54333	0.12419	0.0248833	4.375	1.21e-05	0.0011364
ATG101	6	0.52885	0.113163	0.0023846	4.67335	2.96e-06	0.0003844
LRRN3	8	-0.513922	0.141675	0.0751686	-3.62747	0.0002862	0.0117298
SLC25A39	8	0.516876	0.117795	0.0310795	4.38794	1.14e-05	0.0010819
MFSD2A	7	0.7378	0.100269	0	7.35823	1.86e-13	5.3e-10
CXCL6	8	-0.529847	0.0960553	0	-5.51606	3.47e-08	1.19e-05
DICER1-AS1	5	-0.614432	0.196767	0.0947214	-3.12264	0.0017924	0.0426645
EIF4E2	8	0.558177	0.130574	0.0536467	4.2748	1.91e-05	0.0016409
TSPAN3	8	0.551134	0.107693	0.014952	5.11763	3.09e-07	6.65e-05
WDR72	8	0.509371	0.102957	0.00892833	4.94742	7.52e-07	0.0001293
P2RY14	8	0.501155	0.157229	0.110003	3.18741	0.0014355	0.0366228
TCEAL9	4	0.737035	0.206019	0.0527122	3.57751	0.0003469	0.0135248
SLCO1B3	8	0.698008	0.169831	0.139193	4.11001	3.96e-05	0.0027753
FGFR1	8	0.543122	0.0962803	0	5.64105	1.69e-08	6.58e-06
RRN3P1	4	-0.586081	0.190571	0.0506326	-3.07539	0.0021023	0.0471572
SLC9B2	6	0.77055	0.205987	0.172493	3.74077	0.0001835	0.0084774
CCL26	7	0.867197	0.123661	0.0306388	7.01271	2.34e-12	4.11e-09
SERPINB8	7	0.685005	0.156611	0.0910987	4.37394	1.22e-05	0.0011391
ADAM9	7	0.524342	0.147261	0.0743683	3.56063	0.00037	0.0140754
CSTA	7	0.622788	0.144475	0.068653	4.31068	1.63e-05	0.0014223
DEFB1	7	0.729715	0.141134	0.0619746	5.17035	2.34e-07	5.36e-05
ARNTL2	7	0.690253	0.0996443	0	6.92717	4.29e-12	6.61e-09
AGR2	7	0.703438	0.0997276	0	7.05359	1.74e-12	3.39e-09
TSPAN13	7	0.636864	0.159837	0.100285	3.98446	6.76e-05	0.0040787
GRAMD1A	7	-0.536243	0.0986736	0	-5.43451	5.49e-08	1.64e-05
VSIG2	7	0.759683	0.109785	0.0121831	6.91975	4.52e-12	6.69e-09
EMC3	5	0.504811	0.114436	0	4.41129	1.03e-05	0.0010076
ANXA3	7	0.517531	0.154891	0.090989	3.34125	0.000834	0.0252303
MUC5B	7	-0.921943	0.136401	0.0514779	-6.75905	1.39e-11	1.71e-08
CREB3	7	0.543473	0.136783	0.0561486	3.97325	7.09e-05	0.0042204
SH3RF2	7	0.578438	0.156673	0.0941281	3.692	0.0002225	0.0096563
TPSD1	7	0.722906	0.136733	0.05439	5.287	1.24e-07	3.19e-05
LOC400464	2	-0.81796	0.219924	0	-3.71929	0.0001998	0.0088982
WFDC1	7	0.50013	0.110459	0.0152078	4.52776	5.96e-06	0.0006618
SEC61G	7	0.515608	0.155928	0.0933134	3.3067	0.000944	0.0272854
TCN1	7	0.770184	0.100193	0	7.68704	1.51e-14	9.33e-11
MCUB	3	0.812756	0.172323	0	4.71647	2.4e-06	0.000331
LOC100134317///LOC284412	3	-0.538332	0.169954	0	-3.16751	0.0015375	0.038307
NDUFA1	6	0.540616	0.10818	0	4.99735	5.81e-07	0.0001085
LOC441242	4	-0.513491	0.152358	0.0146056	-3.37029	0.0007509	0.0233701
MMP28	6	0.506342	0.152401	0.0607485	3.32243	0.0008924	0.0263488
SSR4	6	0.507617	0.158257	0.0713531	3.20756	0.0013387	0.0350224
C1QTNF9B-AS1	4	0.707438	0.181318	0.0465071	3.90165	9.55e-05	0.005242
PGLYRP4	7	-0.561635	0.0986848	0	-5.6912	1.26e-08	5.24e-06
MAGED1	6	0.567386	0.108369	0	5.2357	1.64e-07	4.08e-05
GALNT12	7	0.619502	0.122773	0.0322961	5.04592	4.51e-07	8.93e-05
DOCK10	7	-0.523861	0.15911	0.099177	-3.29244	0.0009932	0.0282866
SCNN1G	7	-0.724094	0.18499	0.157873	-3.91423	9.07e-05	0.0050341
CCK	7	0.608926	0.128821	0.0417877	4.72691	2.28e-06	0.0003156
MTFP1	6	0.523225	0.125437	0.0256609	4.17121	3.03e-05	0.0022999
CST4	5	0.942732	0.28287	0.300871	3.33274	0.00086	0.0257828
LTF	7	-0.714563	0.122165	0.0304934	-5.84917	4.94e-09	2.44e-06
LOC283588	5	-0.621084	0.18644	0.0847829	-3.33128	0.0008645	0.0258761
SCGB1A1	7	-0.62446	0.171068	0.124727	-3.65036	0.0002619	0.0110258
PRR4	4	0.860318	0.169891	0.049887	5.06395	4.11e-07	8.51e-05
TPSAB1	6	0.863462	0.208792	0.189653	4.1355	3.54e-05	0.0025681
GALNT5	6	0.523259	0.106543	0.00595435	4.91127	9.05e-07	0.00015
LOC100129034	5	0.562937	0.17509	0.0846213	3.21513	0.0013038	0.0343299
GALNT4	4	0.501151	0.140808	0.0175184	3.55912	0.0003721	0.0141373
SDCBP2	4	0.537037	0.123714	0	4.34096	1.42e-05	0.001276
LOC100289230	4	-0.585539	0.125596	0	-4.66208	3.13e-06	0.0004004
NANOG	5	-0.558989	0.176161	0.0862308	-3.17316	0.0015079	0.0379198
BMS1P5	4	-0.513833	0.166213	0.0428111	-3.09141	0.0019921	0.0454299
TAF1A-AS1	3	0.534793	0.137321	0	3.89448	9.84e-05	0.0053499
LOC642852	5	-0.572295	0.129	0.0177904	-4.43639	9.15e-06	0.0009215
LOC100506282	3	-0.649741	0.205849	0.0632235	-3.1564	0.0015973	0.0393914
LOC100507560	2	-0.88587	0.18115	0	-4.89024	1.01e-06	0.0001626
LOC644135	3	-0.563115	0.175688	0.0184536	-3.20519	0.0013497	0.0351125
LOC102724094	2	1.26425	0.238735	0.0362477	5.29563	1.19e-07	3.09e-05
LOC283177	3	-0.7818	0.184983	0.0254146	-4.22632	2.38e-05	0.0019398
LINC01186	2	0.840063	0.180308	0	4.65905	3.18e-06	0.0004022
PRICKLE2-AS3	2	-0.619249	0.177218	0	-3.49428	0.0004753	0.016929
LOC101060391	2	0.552063	0.176481	0	3.12817	0.001759	0.0422782
LOC100271832	3	-0.736487	0.154764	0	-4.75879	1.95e-06	0.0002758
LOC100507507	3	0.54725	0.144518	0	3.78674	0.0001526	0.0073855
LOC102724587	2	-0.630788	0.177253	0	-3.55869	0.0003727	0.0141459
OR7E2P	2	-0.604111	0.176915	0	-3.4147	0.0006385	0.02087
LOC100653086	2	-0.537277	0.176174	0	-3.0497	0.0022907	0.0499882
COX2	3	0.688088	0.145935	0	4.71503	2.42e-06	0.0003315
LOC101927069	2	-0.750284	0.178933	0	-4.19309	2.75e-05	0.002148
LOC102724537	2	-0.728879	0.178618	0	-4.08066	4.49e-05	0.003013
LOC100506207	2	-0.64388	0.177409	0	-3.62936	0.0002841	0.0116631
LOC100310756	3	0.545697	0.15275	0	3.57249	0.0003536	0.0136304
LOC101929147	2	-0.783309	0.179579	0	-4.36191	1.29e-05	0.0011778
LOC102723886	2	-0.572553	0.176527	0	-3.24342	0.001181	0.0320205
LOC100130429	4	-0.588764	0.131095	0	-4.49112	7.08e-06	0.0007614
LOC101928020	2	-0.806881	0.180043	0	-4.4816	7.41e-06	0.0007893
GATSL2	2	0.705824	0.178359	0	3.95732	7.58e-05	0.0044194
LOC101928943	2	0.568654	0.176497	0	3.22189	0.0012735	0.0336963
LOC100505938	2	0.658708	0.177692	0	3.70703	0.0002097	0.0092535
LOC100506114	2	-0.716107	0.178605	0	-4.00945	6.09e-05	0.0038069
LOC100507516	2	0.587867	0.176757	0	3.32586	0.0008815	0.0261519
LOC102724891	2	-0.795072	0.207736	0.0179558	-3.82732	0.0001295	0.0065513
LOC100506922	2	0.540488	0.17619	0	3.06764	0.0021575	0.048105
LOC101927391	2	-0.605816	0.177005	0	-3.42259	0.0006203	0.020491
LOC100506113	2	0.57553	0.176614	0	3.25868	0.0011193	0.0308067
LOC100289090	3	-0.577177	0.170925	0	-3.37679	0.0007334	0.023014
LOC102724487	2	-0.622612	0.177254	0	-3.51255	0.0004438	0.0161171
MINOS1P1	2	-0.776652	0.244949	0.0480441	-3.17067	0.0015209	0.0381433
CDC42-IT1	2	-0.587662	0.176812	0	-3.32366	0.0008884	0.026286
SEPSECS-AS1	2	-0.566003	0.176538	0	-3.20613	0.0013453	0.0350711
LOC100506538	2	-0.732729	0.22555	0.0320307	-3.24863	0.0011596	0.0315668
ALMS1-IT1	2	-0.608981	0.177139	0	-3.43787	0.0005863	0.0197934
LOC100507291	2	0.598429	0.177005	0	3.38087	0.0007226	0.0227525
LOC100507283	2	-0.549861	0.176436	0	-3.11648	0.0018302	0.0432322
PRR34-AS1	2	0.602521	0.179769	0.00145788	3.35164	0.0008033	0.0245427
MIR4313	2	-0.578934	0.176906	0	-3.27256	0.0010658	0.0298253
C14orf166B	2	0.670137	0.210171	0.0109917	3.18854	0.00143	0.0365315
C11orf82	2	-0.594886	0.19493	0	-3.0518	0.0022747	0.049816
CCBL1	4	0.836794	0.137806	0.0137229	6.07225	1.26e-09	7.4e-07
CXCR7	2	-0.680182	0.195712	0	-3.47543	0.00051	0.0178378
C11orf83	3	0.699385	0.214058	0.0732275	3.26727	0.0010859	0.0302731
FAM108C1	2	0.608726	0.194796	0	3.12494	0.0017784	0.0424781
TPSAB1 /// TPSB2	2	1.26774	0.321722	0.134716	3.94048	8.13e-05	0.0046763
RGS8 /// SDHAP3	2	-0.702536	0.221116	0.0356237	-3.17723	0.0014869	0.0375195
KRT6A /// KRT6B /// KRT6C	2	0.825519	0.172874	0	4.77527	1.79e-06	0.0002581
SNRPN /// SNURF	2	-0.584763	0.169874	0	-3.44234	0.0005767	0.0195229
MYO18A /// TIAF1	2	0.626182	0.170156	0	3.68006	0.0002332	0.010035
ZNF780A /// ZNF780B	2	-0.541537	0.169439	0	-3.19606	0.0013932	0.0358394
MMP23A /// MMP23B	2	0.518297	0.169279	0	3.06178	0.0022002	0.048792
AKAP2 /// PALM2-AKAP2	2	0.600679	0.16988	0	3.5359	0.0004064	0.0151596
